# Supplementary material
Source: HighWire-hosted journal article supplement (http://www.cmaj.ca/highwire/filestream/58694/field_highwire_adjunct_files/0/image-pastora-1-at.pdf)
Supplement: image-pastora-1-at.pdf [file image-pastora-1-at.pdf]

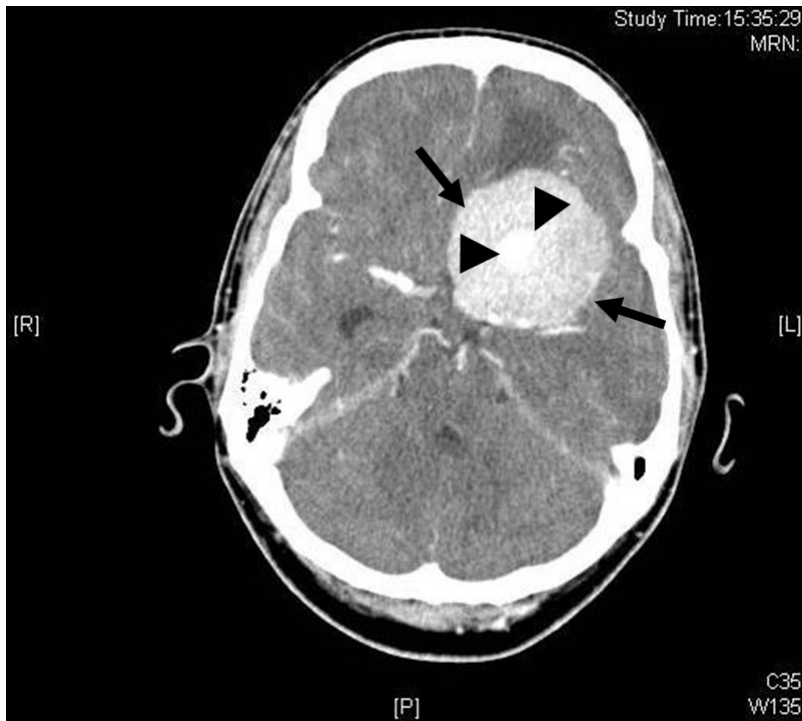

**Appendix 1: Cranial computed tomography of a patient with funduscopy findings of Foster Kennedy syndrome.** The scan shows a large extra-axial mass with intracalcification (arrowheads), consistent with meningioma (arrows). The mass arises from the left anterior clinoid sphenoidal process and is causing direct compression of the left optic nerve. Mild ventriculomegaly is also evident. Impaired cerebral venous drainage, bilateral asymmetric direct compression of the optic disk and chronic elevation of intracranial pressure may produce similar funduscopy findings in the absence of an intracranial mass.
